# Supplementary material for: Inadequate reporting of COVID-19 clinical studies: a renewed rationale for the Sex and Gender Equity in Research (SAGER) guidelines
Source: PubMed Central journal article supplement — BMJ Glob Health. 2021 Apr 12;6(4):e004997. doi: 10.1136/bmjgh-2021-004997 (PMC8047552; doi:10.1136/bmjgh-2021-004997), 2021-04-12

**1. Full search string:**

Search: **((("observational study" [TIAB] or "cohort study" [TIAB] or "clinical trial" [TIAB] or "trial" [TIAB]) AND (2019-nCoV OR 2019nCoV OR COVID-19 OR SARS-CoV-2 OR ((wuhan AND coronavirus) AND 2019/12[PDAT]:2030[PDAT])) AND 2019/12[PDAT]:2020/09/12[PDAT]) ("observational study"[Title/Abstract] OR "cohort study"[Title/Abstract] OR "clinical trial"[Title/Abstract] OR "trial"[Title/Abstract]) AND ("severe acute respiratory syndrome coronavirus 2"[Supplementary Concept] OR "severe acute respiratory syndrome coronavirus 2"[All Fields] OR "2019 ncov"[All Fields] OR "2019nCoV"[All Fields] OR ("severe acute respiratory syndrome coronavirus 2"[Supplementary Concept] OR "severe acute respiratory syndrome coronavirus 2"[All Fields] OR "ncov"[All Fields] OR "2019 ncov"[All Fields] OR "covid 19"[All Fields] OR "sars cov 2"[All Fields] OR ("coronavirus"[All Fields] OR "cov"[All Fields]) AND 2019/11/01:3000/12/31[Date - Publication])) OR ("severe acute respiratory syndrome coronavirus 2"[Supplementary Concept] OR "severe acute respiratory syndrome coronavirus 2"[All Fields] OR "sars cov 2"[All Fields]) OR ("wuhan"[All Fields] AND ("coronavirus"[MeSH Terms] OR "coronavirus"[All Fields] OR "coronaviruses"[All Fields]) AND 2019/12/01:2030/12/31[Date - Publication])) AND 2019/12/01:2020/09/12[Date – Publication]**

## 2. PRISMA flow chart

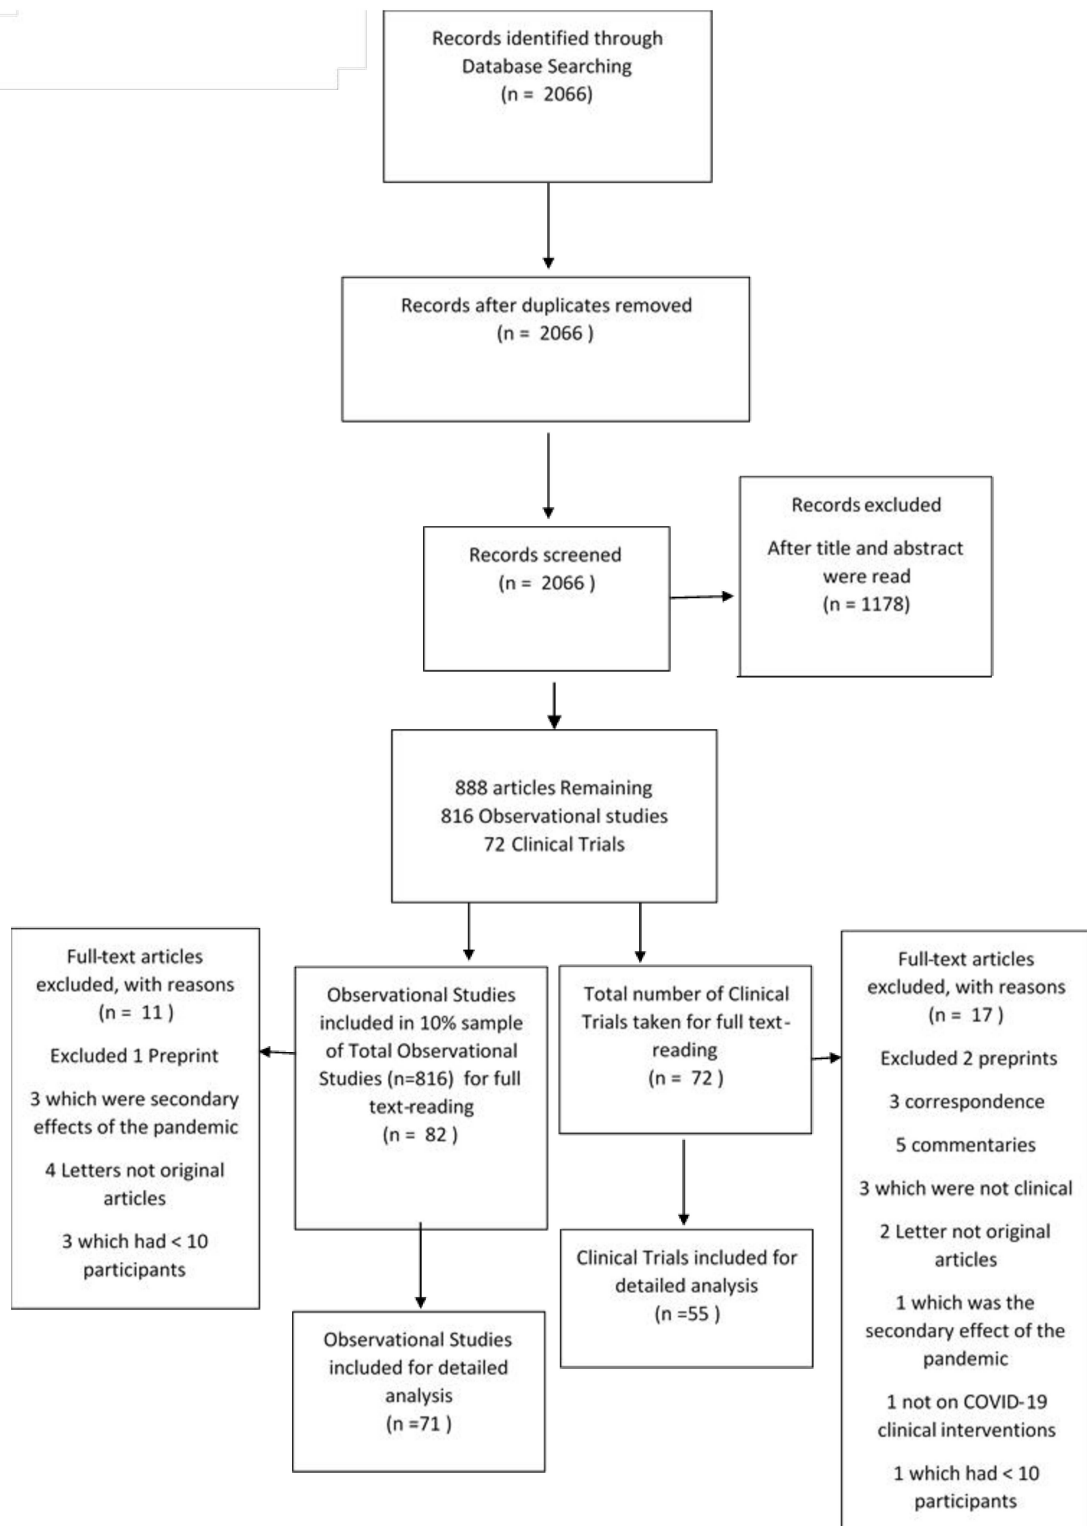

Supplement: bmjgh-2021-004997supp001.pdf [file bmjgh-2021-004997supp001.pdf]
