# Supplementary material for: Inadequate reporting of COVID-19 clinical studies: a renewed rationale for the Sex and Gender Equity in Research (SAGER) guidelines
Source: PubMed Central journal article supplement — BMJ Glob Health. 2021 Apr 12;6(4):e004997. doi: 10.1136/bmjgh-2021-004997 (PMC8047552; doi:10.1136/bmjgh-2021-004997), 2021-04-12
Supplement: bmjgh-2021-004997supp002.pdf [file bmjgh-2021-004997supp002.pdf]

**Key**

| CODE                                 | EXPLANATION                                                                                                                      | UNIT                                 |
|--------------------------------------|----------------------------------------------------------------------------------------------------------------------------------|--------------------------------------|
| Article identifier number (Citation) | Unique ID (Citation)                                                                                                             |                                      |
| Study type                           | Type of study                                                                                                                    | Observational Study / Clinical Trial |
| Size                                 | Size of study (measured in number of participants in relation to average)                                                        | Big / Small                          |
| percfeanalysis                       | Percentage of females in the participating population                                                                            | %                                    |
| findingdisaggSEX                     | Were the main outcome data disaggregated by sex? (n/a refers to single-sex studies)                                              | Yes / No / n/a                       |
| findingsdisaggAGESEX                 | Were the main outcome data disaggregated by sex and age concurrently? (n/a refers to single-sex studies)                         | Yes / No / n/a                       |
| SG Diff observed                     | Were sex or gender mentioned in the Results section as a variable?                                                               | Yes / No                             |
| SAGERTitleab                         | IF only one sex was included, was this made clear in the title and abstract? (n/a refers to studies with more than one sex)      | Yes / No / n/a                       |
| SAGERintro                           | Were the sex and gender differences of COVID-19 acknowledged in the introduction?                                                | Yes / No                             |
| SAGERmethodreport                    | Did the methods section report how men and women were taken into account in the design of the study and the recruitment process? | Yes / No                             |
| SAGERmethodjustify                   | Did the methods section justify the differing number of men and women in their study?                                            | Yes / No                             |
| SAGERgeneralise                      | Does the study address the generalisability of the results to women and men?                                                     | Yes / No                             |
| SAGERanalysis                        | Does the study use 'sex' and 'gender' appropriately?                                                                             | Yes / No                             |
| CT Type of intervention              | What was the type of intervention (treatment or vaccine?)                                                                        | Vaccine / Clinical Trial             |
| CT discontinuation                   | Were there any discontinuations? (only relevant to Clinical Trials)                                                              | Yes / No                             |

**Data Extraction**

| Article identifier number (Citation) | Study type | Size  | percfem analysis | findingdisaggSEX | findingsdisaggAGESEX | SG Diff observed | SAGERTitleab | SAGERintro | SAGERmethodreport | SAGERmethadjustify | SAGERgeneralise | SAGERanalysis | CT Type of intervention | CT discontinuation |
|--------------------------------------|------------|-------|------------------|------------------|----------------------|------------------|--------------|------------|-------------------|--------------------|-----------------|---------------|-------------------------|--------------------|
| 66(Deng et al. 2020)                 | OS         | Small | 48%              | no               | no                   | no               | n/a          | no         | no                | no                 | no              | no            |                         |                    |
| 79(Y Wu et al. 2020)                 | OS         | Small | 100%             | n/a              | n/a                  | no               | yes          | yes        | no                | no                 | no              | no            |                         |                    |
| 106(S. Huang et al. 2020)            | OS         | Big   | 44%              | no               | no                   | no               | n/a          | no         | no                | no                 | no              | no            |                         |                    |
| 107(Dalal et al. 2020)               | OS         | Small | 7%               | yes              | yes                  | no               | n/a          | no         | no                | no                 | no              | no            |                         |                    |
| 127(Bode et al. 2020)                | OS         | Big   | 44%              | no               | no                   | yes              | n/a          | no         | no                | no                 | yes             | no            |                         |                    |
| 132(Davies et al. 2020)              | OS         | Small | 33%              | yes              | no                   | no               | n/a          | no         | no                | no                 | yes             | no            |                         |                    |
| 135(Gao et al. 2020)                 | OS         | Big   | 19%              | no               | no                   | no               | n/a          | no         | no                | no                 | no              | no            |                         |                    |
| 140(Alberici et al. 2020)            | OS         | Small | 20%              | yes              | yes                  | no               | n/a          | no         | no                | no                 | no              | no            |                         |                    |
| 158(Garassino et al. 2020)           | OS         | Big   | 30%              | no               | no                   | no               | n/a          | no         | no                | no                 | no              | no            |                         |                    |
| 164(Qi et al. 2020)                  | OS         | Small | 54%              | no               | no                   | no               | n/a          | no         | no                | no                 | no              | no            |                         |                    |
| 179(Liao et al. 2020)                | OS         | Big   | 46%              | no               | no                   | yes              | n/a          | no         | no                | no                 | no              | no            |                         |                    |
| 192(Zhong et al. 2020)               | OS         | Small | 86%              | no               | no                   | no               | n/a          | no         | no                | no                 | no              | no            |                         |                    |
| 209(Satlin et al. 2020)              | OS         | Small | 37%              | no               | no                   | no               | n/a          | no         | no                | no                 | no              | no            |                         |                    |
| 215(Fung et al., n.d.)               | OS         | Small | 58%              | no               | no                   | no               | n/a          | no         | no                | no                 | no              | no            |                         |                    |
| 216(Bianco et al. 2020)              | OS         | Big   | 100%             | n/a              | n/a                  | no               | yes          | no         | no                | no                 | no              | no            |                         |                    |
| 217(S. Liu et al. 2020)              | OS         | Big   | 47%              | no               | no                   | no               | n/a          | yes        | no                | no                 | no              | yes           |                         |                    |
| 265(Yongran Wu et al. 2020)          | OS         | Small | 44%              | no               | no                   | no               | n/a          | no         | no                | no                 | no              | no            |                         |                    |
| 269(Yu Wang et al. 2020)             | OS         | Big   | n/a              | no               | no                   | no               | n/a          | no         | no                | no                 | no              | no            |                         |                    |
| 271(Hur et al., n.d.)                | OS         | Big   | 44%              | no               | no                   | yes              | n/a          | no         | no                | no                 | no              | yes           |                         |                    |

|                                  |    |       |      |     |     |     |     |     |    |    |    |     |  |  |
|----------------------------------|----|-------|------|-----|-----|-----|-----|-----|----|----|----|-----|--|--|
| 307(Y. Liu et al. 2020)          | OS | Small | 44%  | no  | no  | no  | n/a | no  | no | no | no | no  |  |  |
| 365(L. Chen, Pan, and Zeng 2020) | OS | Big   | 55%  | no  | no  | yes | n/a | no  | no | no | no | no  |  |  |
| 395(Vaid et al. 2020)            | OS | Big   | 35%  | no  | no  | no  | n/a | yes | no | no | no | no  |  |  |
| 405(Stoeckle et al. 2020)        | OS | Small | 18%  | no  | no  | no  | n/a | no  | no | no | no | no  |  |  |
| 445(De Lorenzo et al. 2020)      | OS | Small | 45%  | no  | no  | no  | n/a | no  | no | no | no | no  |  |  |
| 448(Portole 2020)                | OS | Big   | 41%  | no  | no  | no  | n/a | no  | no | no | no | no  |  |  |
| 449(Id et al. 2020)              | OS | Small | 44%  | no  | no  | no  | n/a | no  | no | no | no | no  |  |  |
| 547(D. W. Kim et al. 2020)       | OS | Big   | 61%  | no  | no  | no  | n/a | no  | no | no | no | no  |  |  |
| 552(Ng et al. 2020)              | OS | Small | 0%   | n/a | n/a | no  | yes | no  | no | no | no | no  |  |  |
| 579(J. Kim et al. 2020)          | OS | Big   | 53%  | no  | no  | no  | n/a | no  | no | no | no | no  |  |  |
| 668(Tschopp et al., n.d.)        | OS | Small | 29%  | no  | no  | no  | n/a | no  | no | no | no | no  |  |  |
| 669(Benussi et al. 2020)         | OS | Big   | 46%  | no  | no  | no  | n/a | no  | no | no | no | no  |  |  |
| 695(L. Zhang and Huang 2020)     | OS | Small | 52%  | no  | no  | yes | n/a | no  | no | no | no | yes |  |  |
| 713(Duca et al. 2020)            | OS | Small | 15%  | no  | no  | no  | n/a | no  | no | no | no | no  |  |  |
| 749(Q. Liu et al. 2020)          | OS | Big   | 50%  | no  | no  | no  | n/a | no  | no | no | no | no  |  |  |
| 781(Russo et al. 2020)           | OS | Big   | 38%  | no  | no  | no  | n/a | no  | no | no | no | no  |  |  |
| 825(Poncet-Megemont et al. 2020) | OS | Small | 63%  | yes | no  | no  | n/a | no  | no | no | no | no  |  |  |
| 838(Fresán et al. 2020)          | OS | Big   | 50%  | yes | no  | yes | n/a | no  | no | no | no | yes |  |  |
| 839(Henry et al. 2020)           | OS | Small | 41%  | no  | no  | no  | n/a | no  | no | no | no | no  |  |  |
| 861(Mendoza et al. 2020)         | OS | Small | 100% | n/a | n/a | no  | no  | no  | no | no | no | no  |  |  |

|                                  |    |       |      |     |     |     |     |    |     |    |    |     |  |  |
|----------------------------------|----|-------|------|-----|-----|-----|-----|----|-----|----|----|-----|--|--|
| 864(Salmon et al. 2020)          | OS | Small | 56%  | no  | no  | no  | n/a | no | no  | no | no | no  |  |  |
| 877(Fadini et al. 2020)          | OS | Big   | 37%  | no  | no  | no  | n/a | no | no  | no | no | no  |  |  |
| 886(Dofferhoff et al. 2020)      | OS | Small | 31%  | no  | no  | no  | n/a | no | no  | no | no | no  |  |  |
| 950(Bhumbra et al. 2020)         | OS | Small | 26%  | no  | no  | yes | n/a | no | no  | no | no | yes |  |  |
| 964(J. Liu et al. 2020)          | OS | Small | 42%  | no  | no  | no  | n/a | no | no  | no | no | no  |  |  |
| 968(Pratabarbarbosa et al. 2020) | OS | Small | 46%  | no  | yes | no  | n/a | no | no  | no | no | yes |  |  |
| 970(Mukherjee et al. 2020)       | OS | Small | 30%  | no  | no  | yes | n/a | no | yes | no | no | yes |  |  |
| 973(Domínguez-Salas et al. 2020) | OS | Big   | 74%  | no  | no  | yes | n/a | no | no  | no | no | yes |  |  |
| 1011(Sakai et al. 2020)          | OS | Small | 28%  | no  | no  | yes | n/a | no | no  | no | no | yes |  |  |
| 1033(Sun, Chen, and Viboud 2020) | OS | Big   | 45%  | no  | no  | yes | n/a | no | no  | no | no | no  |  |  |
| 1055(Mahmud et al. 2020)         | OS | Small | 75%  | no  | no  | no  | n/a | no | no  | no | no | no  |  |  |
| 1108(Zhou et al. 2020)           | OS | Small | 36%  | no  | no  | no  | n/a | no | no  | no | no | no  |  |  |
| 1115(Bellosta et al. 2020)       | OS | Small | 9%   | no  | no  | no  | n/a | no | no  | no | no | yes |  |  |
| 1121(Carratal et al. 2020)       | OS | Big   | 29%  | no  | no  | no  | n/a | no | no  | no | no | no  |  |  |
| 1138(Pirjani et al. 2020)        | OS | Small | 100% | n/a | n/a | no  | no  | no | no  | no | no | no  |  |  |
| 1195(Nguyen et al. 2020)         | OS | Big   | 34%  | no  | no  | no  | n/a | no | no  | no | no | no  |  |  |
| 1217(Rosenberg et al. 2020)      | OS | Big   | 40%  | no  | no  | no  | n/a | no | no  | no | no | yes |  |  |
| 1230(Azar et al. 2020)           | OS | Big   | 47%  | no  | no  | no  | n/a | no | no  | no | no | no  |  |  |
| 1310(Mak et al. 2020)            | OS | Small | 34%  | no  | no  | no  | n/a | no | no  | no | no | no  |  |  |
| 1325(Knopp et al. 2020)          | OS | Big   | 38%  | no  | no  | no  | n/a | no | no  | no | no | no  |  |  |

|                                   |    |       |     |     |    |     |     |     |    |    |     |     |                   |    |
|-----------------------------------|----|-------|-----|-----|----|-----|-----|-----|----|----|-----|-----|-------------------|----|
| 1330(Middleton et al. 2020)       | OS | Small | 50% | no  | no | no  | n/a | no  | no | no | no  | no  |                   |    |
| 1337(Stoichitoiu et al. 2020)     | OS | Small | 57% | no  | no | no  | n/a | no  | no | no | no  | no  |                   |    |
| 1354(J. Wu et al. 2020)           | OS | Big   | 45% | no  | no | no  | n/a | no  | no | no | no  | no  |                   |    |
| 1395(Guaraldi et al. 2020)        | OS | Big   | 34% | no  | no | no  | n/a | no  | no | no | no  | yes |                   |    |
| 1470(Winston et al. 2020)         | OS | Big   | 13% | no  | no | no  | n/a | no  | no | no | no  | no  |                   |    |
| 1557(Dong et al. 2020)s           | OS | Big   | 67% | no  | no | no  | n/a | no  | no | no | no  | no  |                   |    |
| 1559(Foy et al. 2020)             | OS | Big   | 46% | no  | no | no  | n/a | no  | no | no | no  | no  |                   |    |
| 1592(Del Amo et al. 2020)         | OS | Big   | 25% | yes | no | yes | n/a | yes | no | no | no  | no  |                   |    |
| 1480(Golestaneh et al. 2020)      | OS | Big   | 67% | no  | no | no  | n/a | no  | no | no | no  | no  |                   |    |
| 1578(Xia et al. 2020)             | OS | Big   | 50% | no  | no | no  | n/a | no  | no | no | no  | no  |                   |    |
| 1504(Yan et al. 2020)             | OS | Big   | 51% | yes | no | no  | n/a | no  | no | no | no  | no  |                   |    |
| 1501(S. Zhang et al. 2020)        | OS | Big   | 67% | no  | no | no  | n/a | no  | no | no | no  | no  |                   |    |
| 20(B. Cao et al. 2020)            | CT | Big   | 40% | no  | no | no  | n/a | no  | no | no | no  | no  | treatment testing | no |
| 50(Gabriela et al. 2020)          | CT | Small | 25% | no  | no | no  | n/a | no  | no | no | no  | no  | treatment testing | no |
| 62(Sengupta et al. 2020)          | CT | Small | 26% | no  | no | no  | n/a | no  | no | no | no  | no  | treatment testing | no |
| 249(Amat-Santos et al. 2020)      | CT | Big   | 43% | no  | no | no  | n/a | no  | no | no | no  | no  | treatment testing | no |
| 373(Y. Huang et al. 2020)         | CT | Small | 54% | no  | no | no  | n/a | no  | no | no | no  | no  | treatment testing | no |
| 555(Davoudimonfared et al. 2020)  | CT | Small | 46% | no  | no | no  | n/a | no  | no | no | yes | yes | treatment testing | no |
| 559(Hu et al. 2020)               | CT | Small | 70% | no  | no | no  | n/a | no  | no | no | no  | no  | treatment testing | no |
| 598(Dastan, Alireza, et al. 2020) | CT | Small | 20% | no  | no | no  | n/a | no  | no | no | no  | no  | treatment testing | no |

|                                              |    |       |         |     |     |    |     |    |    |    |    |    |    |                   |     |
|----------------------------------------------|----|-------|---------|-----|-----|----|-----|----|----|----|----|----|----|-------------------|-----|
| 646(Deftereos et al. 2020)                   | CT | Big   | 42%     | no  | no  | no | n/a | no | no | no | no | no | no | treatment testing | no  |
| 675(Zheng et al. 2020)                       | CT | Small | 53%     | no  | no  | no | n/a | no | no | no | no | no | no | treatment testing | no  |
| 678(Dastan, Saffaei, et al. 2020)            | CT | Small | 36%     | no  | no  | no | n/a | no | no | no | no | no | no | treatment testing | no  |
| 751(Jeronimo, et al. 2020)                   | CT | Big   | 35%     | no  | no  | no | n/a | no | no | no | no | no | no | treatment testing | no  |
| 772(T. Li et al. 2020)                       | CT | Small | 22%     | no  | no  | no | n/a | no | no | no | no | no | no | treatment testing | no  |
| 773(Fu et al. 2020)                          | CT | Small | 42%     | no  | no  | no | n/a | no | no | no | no | no | no | treatment testing | no  |
| 828(Xiong et al. 2020)                       | CT | Small | no data | no  | no  | no | n/a | no | no | no | no | no | no | treatment testing | no  |
| 849(Ren et al. 2020)                         | CT | Small | 40%     | no  | no  | no | n/a | no | no | no | no | no | no | treatment testing | no  |
| 876(Rahmani et al. 2020)                     | CT | Small | 41%     | no  | no  | no | n/a | no | no | no | no | no | no | treatment testing | yes |
| 909(Spinner et al. 2020)                     | CT | Big   | 39%     | no  | no  | no | n/a | no | no | no | no | no | no | treatment testing | yes |
| 951(Xiao et al. 2020)                        | CT | Big   | 44%     | no  | no  | no | n/a | no | no | no | no | no | no | treatment testing | no  |
| 961(L. Li et al. 2020)                       | CT | Big   | 42%     | no  | no  | no | n/a | no | no | no | no | no | no | treatment testing | yes |
| 971(Furtado et al. 2020)                     | CT | Big   | 34%     | no  | no  | no | n/a | no | no | no | no | no | no | treatment testing | no  |
| 1010(Meng et al. 2020)                       | CT | Small | 39%     | yes | yes | no | n/a | no | no | no | no | no | no | treatment testing | no  |
| 1037(Entrenas et al. 2020)                   | CT | Small | 41%     | no  | no  | no | n/a | no | no | no | no | no | no | treatment testing | no  |
| 1046(Hamidi et al. 2020)                     | CT | Small | 54%     | no  | no  | no | n/a | no | no | no | no | no | no | treatment testing | no  |
| 1227(Hill and Merat 2020)                    | CT | Small | 48%     | no  | no  | no | n/a | no | no | no | no | no | no | treatment testing | yes |
| 1262(Davoodi et al. 2020)                    | CT | Small | 41%     | no  | no  | no | n/a | no | no | no | no | no | no | treatment testing | yes |
| 1314(Tomazini et al. 2020)                   | CT | Big   | 34%     | no  | no  | no | n/a | no | no | no | no | no | no | treatment testing | no  |
| 1436(The Writing Committee for the REMAP-CAP | CT | Big   | 29%     | no  | no  | no | n/a | no | no | no | no | no | no | treatment testing | yes |

| Investigators 2020)           |    |       |     |    |    |     |     |    |    |    |    |    |    |                   |     |
|-------------------------------|----|-------|-----|----|----|-----|-----|----|----|----|----|----|----|-------------------|-----|
| 1522(SA et al. 2020)          | CT | Small | 10% | no | no | no  | n/a | no | no | no | no | no | no | treatment testing | no  |
| 1540(Cheng et al. 2020)       | CT | Big   | 44% | no | no | yes | n/a | no | no | no | no | no | no | treatment testing | no  |
| 1597(Ansarin et al. 2020)     | CT | Small | 45% | no | no | no  | n/a | no | no | no | no | no | no | treatment testing | no  |
| 1624(Coler et al. 2020)       | CT | Small | 51% | no | no | no  | n/a | no | no | no | no | no | no | Vaccine           | no  |
| 1625(Zhu et al. 2020)         | CT | Big   | 36% | no | no | no  | n/a | no | no | no | no | no | no | Vaccine           | no  |
| 1626(Yeming Wang et al. 2020) | CT | Big   | 40% | no | no | no  | n/a | no | no | no | no | no | no | treatment testing | yes |
| 1627(Boulware et al. 2020)    | CT | Big   | 52% | no | no | no  | n/a | no | no | no | no | no | no | treatment testing | no  |
| 1628(Folegatti et al. 2020)   | CT | Big   | 50% | no | no | no  | n/a | no | no | no | no | no | no | vaccine           | no  |
| 1629(Hung et al. 2020)        | CT | Big   | 47% | no | no | no  | n/a | no | no | no | no | no | no | treatment testing | yes |
| 1630(Tang et al. 2020)        | CT | Big   | 45% | no | no | no  | n/a | no | no | no | no | no | no | treatment testing | no  |
| 1631(Y. Cao et al. 2020)      | CT | Small | 41% | no | no | no  | n/a | no | no | no | no | no | no | treatment testing | yes |
| 1632(Goldman et al. 2020)     | CT | Big   | 36% | no | no | no  | n/a | no | no | no | no | no | no | treatment testing | yes |
| 1633(Cavalcanti et al. 2020)  | CT | Big   | 42% | no | no | no  | n/a | no | no | no | no | no | no | treatment testing | yes |
| 1634(Zhu et al. 2020)         | CT | Big   | 50% | no | no | yes | n/a | no | no | no | no | no | no | Vaccine           | no  |
| 1635(Skipper et al. 2020)     | CT | Big   | 50% | no | no | no  | n/a | no | no | no | no | no | no | treatment testing | no  |
| 1636(Joyner et al. 2020)      | CT | Big   | 36% | no | no | no  | n/a | no | no | no | no | no | no | treatment testing | no  |
| 1637(Mitjà, et al. 2020)      | CT | Big   | 67% | no | no | no  | n/a | no | no | no | no | no | no | treatment testing | yes |
| 1640(Keech et al. 2020)       | CT | Big   | 50% | no | no | no  | n/a | no | no | no | no | no | no | Vaccine           | no  |
| 1641(Klersy 2020)             | CT | Small | 39% | no | no | no  | n/a | no | no | no | no | no | no | treatment testing | no  |

|                                          |    |       |     |    |    |    |     |    |    |    |    |    |    |                   |     |
|------------------------------------------|----|-------|-----|----|----|----|-----|----|----|----|----|----|----|-------------------|-----|
| 1642(Sekhavati et al. 2020)              | CT | Big   | 54% | no | no | no | n/a | no | no | no | no | no | no | treatment testing | no  |
| 1644(Asgharpour et al. 2020)             | CT | Small | 50% | no | no | no | n/a | no | no | no | no | no | no | treatment testing | no  |
| 1645(Bronte, Lunardi, and Olivieri 2020) | CT | Small | 50% | no | no | no | n/a | no | no | no | no | no | no | treatment testing | no  |
| 1653(J. Chen et al. 2020)                | CT | Small | 40% | no | no | no | n/a | no | no | no | no | no | no | treatment testing | yes |
| 1656(Abd-elsalam et al. 2020)            | CT | Big   | 41% | no | no | no | n/a | no | no | no | no | no | no | treatment testing | no  |
| 1657(Beigel et al. 2020)                 | CT | Big   | 36% | no | no | no | n/a | no | no | no | no | no | no | treatment testing | yes |
| 1826(Kasgari et al. 2020)                | CT | Small | 63% | no | no | no | n/a | no | no | no | no | no | no | treatment testing | no  |
| 2106(Eslami et al. 2020)                 | CT | Small | 50% | no | no | no | n/a | no | no | no | no | no | no | treatment testing | no  |

## References

Abd-elsalam, Sherief, Eslam Saber Esmail, Mai Khalaf, Ehab Fawzy Abdo, Mohammed A Medhat, Mohamed Samir, Abd El, et al. 2020. "Hydroxychloroquine in the Treatment of COVID-19 : A Multicenter Randomized Controlled Study" 103 (4): 1635–39. <https://doi.org/10.4269/ajtmh.20-0873>.

Alberici, Federico, Elisa Delbarba, Chiara Manenti, Laura Econimo, Francesca Valerio, Alessandra Pola, Camilla Maffei, et al. 2020. "A Single Center Observational Study Of&nbsp;the Clinical Characteristics and Short-Term Outcome of 20 Kidney Transplant Patients Admitted for SARS-CoV2 Pneumonia." *Kidney International* 97 (6): 1083–88. <https://doi.org/10.1016/j.kint.2020.04.002>.

Amat-Santos, I. J, S Santos-Martinez, D López-Otero, L Nombela-Franco, E Gutiérrez-Ibanes, R Del Valle, E Muñoz-García, et al. 2020. "Ramipril in High-Risk Patients With COVID-19." *J Am Coll Cardiol* 76 (3): 268–276. <https://doi.org/10.1016/j.jacc.2020.05.040>.

Amo, J Del, R Polo, S Moreno, A Díaz, E Martínez, JR Arribas, I Jarrín, and MA Hernán. 2020. "Incidence and Severity of COVID-19 in HIV-Positive Persons Receiving Antiretroviral Therapy : A Cohort Study." *Ann Intern Med* 173 (7): 536–41. <https://doi.org/10.7326/M20-3689>.

Ansarin, Khalil, Ramin Tolouian, Mohammadreza Ardalan, Ali Taghizadieh, Mojtaba Varshochi, Soheil Teimouri, Tahere Vaezi, et al. 2020. "Effect of Bromhexine on Clinical Outcomes and Mortality in COVID-19 Patients: A Randomized Clinical Trial." *Tabriz University of Medical Sciences* 10 (4): 209–15. <https://doi.org/10.34172/bi.2020.27>.

Asgharpour, Masoumeh, Hamed Mehdinezhad, Masoumeh Bayani, Mahmoud Sadeghi, Haddad Zavareh, Seyed Hossein Hamidi, Roghayeh Akbari, Reza Ghadimi, Ali Bijani, and Simin Mouodi. 2020. "Effectiveness of Extracorporeal Blood Purification ( Hemoadsorption ) in Patients with Severe Coronavirus Disease 2019." *BMC Nephrology* 21 (356).



- Azar, Marwan M, Dayna Mcmanus, Sheau-chiann Chen, Shana E Gleeson, Trisha Burrello, Zachary Harris, Merceditas S Villanueva, Lydia Aoun-barakat, and Insoo Kang. 2020. "Tocilizumab Treatment for Cytokine Release Syndrome in Hospitalized COVID-19 Patients." *CHEST* 5 (June): 1–12. <https://doi.org/10.1016/j.chest.2020.06.006>.
- Beigel, John H., Kay M. Tomashek, Lori E. Dodd, Aneesh K. Mehta, Barry S. Zingman, Andre C. Kalil, Elizabeth Hohmann, et al. 2020. "Remdesivir for the Treatment of Covid-19 — Final Report." *New England Journal of Medicine*, 1813–26. <https://doi.org/10.1056/nejmoa2007764>.
- Bellosta, Raffaello, Luca Luzzani, Giuseppe Natalini, and Alberto Pegorer. 2020. "Acute Limb Ischemia in Patients with COVID-19 Pneumonia." *Journal of Vascular Surgery* 72 (6): 1864–72.
- Benussi, Alberto, Andrea Pilotto, Enrico Premi, Ilenia Libri, and Marcello Giunta. 2020. "Clinical Characteristics and Outcomes of Inpatients with Neurologic Disease and COVID-19 in Brescia, Lombardy, Italy." *Neurology* 95 (7). <https://doi.org/10.1212/WNL.0000000000009848>.
- Bhumbra, Samina, Stefan Malin, Lindsey Kirkpatrick, Alka Khaitan, Chandy C John, Courtney M Rowan, and Leslie A Enane. 2020. "Clinical Features of Critical Coronavirus Disease 2019 in Children\*" 21 (10). <https://doi.org/10.1097/PCC.0000000000002511>.
- Bianco, Angela, Ayisha B Buckley, Jessica Overbey, Scott Smilen, Brian Wagner, Cheryl Dinglas, Holly Loudon, Alan Garely, Michael Brodman, and Joanne Stone. 2020. "Testing of Patients and Support Persons for Infection Before Scheduled Deliveries" 136 (2): 283–87. <https://doi.org/10.1097/AOG.0000000000003985>.
- Bode, Bruce, Valerie Garrett, Jordan Messler, Raymie Mcfarland, Jennifer Crowe, Robby Booth, and David C Klonoff. 2020. "Glycemic Characteristics and Clinical Outcomes of COVID-19 Patients Hospitalized in the United States." <https://doi.org/10.1177/1932296820924469>.
- Boulware, David R., Matthew F. Pullen, Ananta S. Bangdiwala, Katelyn A. Pastick, Sarah M. Lofgren, Elizabeth C. Okafor, Caleb P. Skipper, et al. 2020. "A Randomized Trial of Hydroxychloroquine as Postexposure Prophylaxis for Covid-19." *New England Journal of Medicine* 383 (6): 517–25. <https://doi.org/10.1056/nejmoa2016638>.
- Bronte, Vincenzo, Claudio Lunardi, and Oliviero Olivieri. 2020. "Baricitinib Restrains the Immune Dysregulation in Severe COVID-19 Patients." *J Clin Invest* 130 (12): 6409–16.
- Cao, Bin, Yeming Wang, Danning Wen, Wen Liu, Jingli Wang, Guohui Fan, Lianguo Ruan, et al. 2020. "A Trial of Lopinavir–Ritonavir in Adults Hospitalized with Severe Covid-19." *New England Journal of Medicine* 382 (19): 1787–99. <https://doi.org/10.1056/nejmoa2001282>.
- Cao, Yang, Jia Wei, Liang Zou, Tiebin Jiang, and Gaoxiang Wang. 2020. "Ruxolitinib in Treatment of Severe Coronavirus Disease 2019 (COVID-19): A Multicenter, Single-Blind, Randomized Controlled Trial." *J ALLERGY CLIN IMMUNOL*, no. January.
- Carratal, Jordi, Pablo Ryan, Jesús Rodríguez-ba, and Juan Berenguer. 2020. "Treatment with Tocilizumab or Corticosteroids for COVID-19 Patients with Hyperinflammatory State : A Multicentre Cohort Study ( SAM- Nimo Pach o Ram O," no. xxxx. <https://doi.org/10.1016/j.cmi.2020.08.010>.
- Cavalcanti, Alexandre B., Fernando G. Zampieri, Regis G. Rosa, Luciano C.P. Azevedo, Viviane C. Veiga, Alvaro Avezum, Lucas P. Damiani, et al. 2020. "Hydroxychloroquine with or without Azithromycin in Mild-to-Moderate Covid-19." *New England Journal of Medicine* 383 (21): 2041–52. <https://doi.org/10.1056/nejmoa2019014>.
- Chen, Jun, Lu Xia, Li Liu, Qingnian Xu, Yun Ling, Dan Huang, Wei Huang, et al. 2020. "Antiviral Activity and Safety of Darunavir / Cobicistat for the Treatment of COVID-19," 1–5. <https://doi.org/10.1093/ofid/ofaa241>.
- Chen, Lulu, An Pan, and Tianshu Zeng. 2020. "Impaired Fasting Glucose and Diabetes Are Related to Higher Risks of Complications and Mortality Among Patients With Coronavirus Disease 2019." *Front Endocrinol (Lausanne)* 11 (July): 1–11. <https://doi.org/10.3389/fendo.2020.00525>.

- Cheng, LL, WJ Guan, CY Duan, NF Zhang, CL Lei, Y Hu, AL Chen, et al. 2020. "Effect of Recombinant Human Granulocyte Colony–Stimulating Factor for Patients With Coronavirus Disease 2019 (COVID-19) and Lymphopenia: A Randomized Clinical Trial." *JAMA Internal Medicine* 2019: 1–8. <https://doi.org/10.1001/jamainternmed.2020.5503>.
- Coler, R N, M P Mccullough, J D Chappell, M R Denison, L J Stevens, K M Morabito, S O Dell, et al. 2020. "An mRNA Vaccine against SARS-CoV-2 — Preliminary Report." <https://doi.org/10.1056/NEJMoa2022483>.
- Dalal, Ashish, Deepak Jakhar, Vishal Agarwal, and Ravi Beniwal. 2020. "Dermatological Findings in SARS-CoV-2 Positive Patients : An Observational Study from North India," no. June: 3–6. <https://doi.org/10.1111/dth.13849>.
- Dastan, Farzaneh, Seyed Alireza, Ali Saffaei, Majid Marjani, and Afshin Moniri. 2020. "Subcutaneous Administration of Interferon Beta-1a for COVID-19: A Non-Controlled Prospective Trial." *International Immunopharmacology* 85 (January).
- Dastan, Farzaneh, Ali Saffaei, Sara Haseli, Majid Marjani, Afshin Moniri, and Zahra Abtahian. 2020. "Promising Effects of Tocilizumab in COVID-19: A Non-Controlled, Prospective Clinical Trial." *International Immunopharmacology* 88 (January).
- Davies, Patrick, Claire Evans, Hari Krishnan Kanthimathinathan, Jon Lillie, Joseph Brierley, Gareth Waters, Mae Johnson, and Benedict Griffiths. 2020. "Intensive Care Admissions of Children with Paediatric Inflammatory Multisystem Syndrome Temporally Associated with SARS-CoV-2 ( PIMS-TS ) in the UK : A Multicentre Observational Study" 2: 669–77. [https://doi.org/10.1016/S2352-4642\(20\)30215-7](https://doi.org/10.1016/S2352-4642(20)30215-7).
- Davoodi, Lotfollah, Seyed Mohammad, Abedi Ebrahim, Reza Alizadeh-navaei Hamed, Rouhanizadeh Ghasemali, and Seyed Jalal Hosseinimehr. 2020. "Febuxostat Therapy in Outpatients with Suspected COVID-19 : A Clinical Trial," no. June: 1–8. <https://doi.org/10.1111/ijcp.13600>.
- Davoudi-monfared, Effat, Hamid Rahmani, Hossein Khalili, Mahboubeh Hajiabdolbaghi, and Mohamadreza Salehi. 2020. "A Randomized Clinical Trial of the Efficacy and Safety of Interferon  $\beta$ -1a in Treatment of Severe COVID-19." *Antimicrob Agents Chemother* 64 (9): 1–14. <https://doi.org/10.1128/AAC.01061-20>.
- Deftereos, Spyridon G, Georgios Giannopoulos, Dimitrios A Vrachatis, Gerasimos D Siasos, and Sotiria G Giotaki. 2020. "Effect of Colchicine vs Standard Care on Cardiac and Inflammatory Biomarkers and Clinical Outcomes in Patients Hospitalized With Coronavirus Disease 2019 The GRECCO-19 Randomized Clinical Trial," 1–14. <https://doi.org/10.1001/jamanetworkopen.2020.13136>.
- Deng, Lisi, Chunna Li, Qi Zeng, Xi Liu, Xinghua Li, Haitang Zhang, Zhongsi Hong, and Jinyu Xia. 2020. "Arbidol Combined with LPV / r versus LPV / r Alone against Corona Virus Disease 2019 : A Retrospective Cohort Study." *Journal of Infection* 81 (1): e1–5. <https://doi.org/10.1016/j.jinf.2020.03.002>.
- Dofferhoff, Anton S M, Ianthe Piscaer, Leon J Schurgers, Margot P J Visser, Jody M W van den Ouweland, Pim A de Jong, Reinoud Gosens, et al. 2020. "Reduced Vitamin K Status as a Potentially Modifiable Risk Factor of Severe Coronavirus Disease 2019." *Clinical Infectious Diseases*, no. Xx: 1–8. <https://doi.org/10.1093/cid/ciaa1258>.
- Domínguez-Salas, S, J Gómez-Salgado, M Andrés-Villas, D Díaz-Milanés, M Romero-Martín, and C Ruiz-Frutos. 2020. "Psycho-Emotional Approach to the Psychological Distress Related to the COVID-19 Pandemic in Spain : A Cross-Sectional Observational Study." *Healthcare (Basel)* 8 (3).
- Dong, Jianghu, Lianpin Wu, Qike Jin, Jie Chen, and Jiawei He. 2020. "Diagnostic Accuracy of Chest CT Scans for Suspected Patients with COVID-19 in a Retrospective Cohort Study Table of Contents."
- Duca, Andrea, Irdi Memaj, Federico Zanardi, Carlo Preti, Andrea Alesi, Lorenzo Della Bella, Elena Ghezzi, et al. 2020. "Severity of Respiratory Failure and Outcome of Patients Needing a Ventilatory Support in the Emergency Department during Italian Novel Coronavirus SARS-CoV2 Outbreak: Preliminary Data on the Role of Helmet

- CPAP and Non-Invasive Positive Pressure Ventilation." *EClinicalMedicine* 24: 1–7. <https://doi.org/10.1016/j.eclinm.2020.100419>.
- Entrenas, Marta, Luis Manuel, Entrenas Costa, Roger Bouillon, and Juan Francisco. 2020. "Effect of Calcifediol Treatment and Best Available Therapy versus Best Available Therapy on Intensive Care Unit Admission and Mortality among Patients Hospitalized for COVID-19: A Pilot Randomized Clinical Study." *Journal of Steroid Biochemistry and Molecular Biology* 203 (January).
- Eslami, Gholamali, Sajedeh Mousaviasl, Esmat Radmanesh, Saeed Jelvey, Saeid Bitaraf, Bryony Simmons, Morteza Mobarak, et al. 2020. "The Impact of Sofosbuvir / Daclatasvir or Ribavirin in Patients with Severe COVID-19," 3–9. <https://doi.org/10.1093/jac/dkaa331>.
- Fadini, Gian Paolo, Mario Luca, Morieri Enrico, Longato Be, Benedetta Maria, Bonora Silvia, Pinelli Elisa, et al. 2020. "Exposure to Dipeptidyl-Peptidase-4 Inhibitors and COVID-19 among People with Type 2 Diabetes : A Case-Control Study." *Diabetes Obes Metab* 22 (10): 1946–50. <https://doi.org/10.1111/dom.14097>.
- Folegatti, Pedro M., Katie J. Ewer, Parvinder K. Aley, Brian Angus, Stephan Becker, Sandra Belij-Rammerstorfer, Duncan Bellamy, et al. 2020. "Safety and Immunogenicity of the ChAdOx1 NCoV-19 Vaccine against SARS-CoV-2: A Preliminary Report of a Phase 1/2, Single-Blind, Randomised Controlled Trial." *The Lancet* 396 (10249): 467–78. [https://doi.org/10.1016/S0140-6736\(20\)31604-4](https://doi.org/10.1016/S0140-6736(20)31604-4).
- Foy, Brody H, Jonathan C T Carlson, Erik Reinertsen, Raimon Padros I Valls, Roger Pallares Lopez, and Eric Palanques-tost. 2020. "Association of Red Blood Cell Distribution Width With Mortality Risk in Hospitalized Adults With SARS-CoV-2 Infection" 3 (9): 1–13. <https://doi.org/10.1001/jamanetworkopen.2020.22058>.
- Fresán, U, M Guevara, F Elía, E Albéniz, C Burgui, and J Castilla. 2020. "Independent Role of Morbid Obesity as a Risk Factor for COVID-19 Hospitalization: A Spanish Population-Based Cohort Study." *Obesity (Silver Spring)* doi: 10.10. <https://doi.org/10.1002/oby.23029>.
- Fu, Weihui, Yan Liu, Lu Xia, Min Li, Zhigang Song, Huiliang Hu, Zongguo Yang, et al. 2020. "A Clinical Pilot Study on the Safety and Efficacy of Aerosol Inhalation Treatment of IFN- $\gamma$  plus TFF2 in Patients with Moderate COVID-19." *EClinicalMedicine* 25. <https://doi.org/10.1016/j.eclinm.2020.100478>.
- Fung, Kitty S C, Sandy K Y Chau, Erica Y L Leung, Thomas S C Hui, Steven W C Tsang, K N Kung, Eudora Y D Chow, et al. n.d. "COVID-19 Viral Load in the Severity of and Recovery From Olfactory and Gustatory Dysfunction." <https://doi.org/10.1002/lary.29056>.
- Furtado, Remo H.M., Otavio Berwanger, Henrique A. Fonseca, Thiago D. Corrêa, Leonardo R. Ferraz, Maura G. Lapa, Fernando G. Zampieri, et al. 2020. "Azithromycin in Addition to Standard of Care versus Standard of Care Alone in the Treatment of Patients Admitted to the Hospital with Severe COVID-19 in Brazil (COALITION II): A Randomised Clinical Trial." *The Lancet* 396 (10256): 959–67. [https://doi.org/10.1016/S0140-6736\(20\)31862-6](https://doi.org/10.1016/S0140-6736(20)31862-6).
- Gabriela, Mayla, Silva Borba, Fernando Fonseca, Almeida Val, Vanderson Souza Sampaio, Marcia Almeida, Araújo Alexandre, and Gisely Cardoso Melo. 2020. "Effect of High vs Low Doses of Chloroquine Diphosphate as Adjunctive Therapy for Patients Hospitalized With Severe Acute Respiratory Syndrome Coronavirus 2 ( SARS-CoV-2 ) Infection A Randomized Clinical Trial" 2: 1–14. <https://doi.org/10.1001/jamanetworkopen.2020.8857>.
- Gao, Chao, Yue Cai, Kan Zhang, Lei Zhou, Yao Zhang, Xijing Zhang, Qi Li, et al. 2020. "Association of Hypertension and Antihypertensive Treatment with COVID-19 Mortality : A Retrospective Observational Study," 2058–66. <https://doi.org/10.1093/eurheartj/ehaa433>.
- Garassino, Marina Chiara, Jennifer G Whisenant, Li-ching Huang, Annalisa Trama, Valter Torri, Francesco Agustoni, Javier Baena, and Giuseppe Banna. 2020. "COVID-19 in Patients with Thoracic Malignancies ( TERA-VOLT ): First Results of an International , Registry-Based , Cohort Study" 21 (July). [https://doi.org/10.1016/S1470-2045\(20\)30314-4](https://doi.org/10.1016/S1470-2045(20)30314-4).
- Goldman, Jason D., David C.B. Lye, David S. Hui, Kristen M. Marks, Raffaele Bruno, Rocio Montejano, Christoph D. Spinner, et al. 2020. "Remdesivir for 5 or 10 Days in

- Patients with Severe Covid-19." *New England Journal of Medicine* 383 (19): 1827–37. <https://doi.org/10.1056/nejmoa2015301>.
- Golestaneh, Ladan, Joel Neugarten, Molly Fisher, Henny H Billett, Morayma Reyes, Tanya Johns, Milagros Yunes, et al. 2020. "EClinicalMedicine The Association of Race and COVID-19 Mortality." *EClinicalMedicine* 25: 100455. <https://doi.org/10.1016/j.eclinm.2020.100455>.
- Guaraldi, Giovanni, Marianna Meschiari, Alessandro Cozzi-Iepri, Jovana Milic, Roberto Tonelli, Marianna Menozzi, Erica Franceschini, et al. 2020. "Tocilizumab in Patients with Severe COVID-19 : A Retrospective Cohort Study" 2 (August). [https://doi.org/10.1016/S2665-9913\(20\)30173-9](https://doi.org/10.1016/S2665-9913(20)30173-9).
- Hamidi, Daryoush, Ahmad Bagheri, Shahram Amini, Reza Keramati, Azam Moradi, Aida Hamidi, Mohammadamin Damsaz, Hamed Banpour, Amir Yarahmadi, and George Koliakos. 2020. "Application of Methylene Blue -Vitamin C – N-Acetyl Cysteine for Treatment of Critically Ill COVID-19 Patients , Report of a Phase-I Clinical Trial ☆." *European Journal of Pharmacology* 885 (June): 173494. <https://doi.org/10.1016/j.ejphar.2020.173494>.
- Henry, Brandon Michael, Justin Lee Benoit, Stefanie Benoit, Christina Pulvino, Brandon A Berger, Maria Helena, Santos De Olivera, Christopher A Crutchfield, and Giuseppe Lippi. 2020. "Red Blood Cell Distribution Width ( RDW ) Predicts COVID-19 Severity : A Prospective , Observational Study from the Cincinnati SARS-CoV-2 Emergency Department Cohort" 2019: 1–9.
- Hill, Andrew, and Shahin Merat. 2020. "Sofosbuvir and Daclatasvir Compared with Standard of Care in the Treatment of Patients Admitted to Hospital with Moderate or Severe Coronavirus Infection ( COVID-19 ): A Randomized Controlled Trial," 1–7. <https://doi.org/10.1093/jac/dkaa334>.
- Hu, Ke, Mengmei Wang, Yang Zhao, Yunting Zhang, Tao Wang, Zhishui Zheng, and Xiaochen Li. 2020. "RESEARCH ARTICLE A Small-Scale Medication of Leflunomide as a Treatment of COVID-19 in an Open-Label Blank-Controlled Clinical Trial" 12250. <https://doi.org/10.1007/s12250-020-00258-7>.
- Huang, Songjiang, Jianwen Wang, Fen Liu, Jiacheng Liu, Guijuan Cao, Chongtu Yang, Wei Liu, Chao Tu, Muxin Zhu, and Bin Xiong. 2020. "COVID-19 Patients with Hypertension Have More Severe Disease : A Multicenter Retrospective Observational Study." *Hypertension Research*, 824–31. <https://doi.org/10.1038/s41440-020-0485-2>.
- Huang, Yin-qiu, Sheng-quan Tang, Xiao-lei Xu, Yan-ming Zeng, and Xiao-qing He. 2020. "No Statistically Apparent Difference in Antiviral Effectiveness Observed Among Ribavirin Plus Interferon- Alpha , Lopinavir / Ritonavir Plus Interferon-Alpha , and Ribavirin Plus Lopinavir / Ritonavir Plus Interferon- Alpha in Patients With Mild to Modera" 11 (July): 1–11. <https://doi.org/10.3389/fphar.2020.01071>.
- Hung, Ivan Fan Ngai, Kwok Cheung Lung, Eugene Yuk Keung Tso, Raymond Liu, Tom Wai Hin Chung, Man Yee Chu, Yuk Yung Ng, et al. 2020. "Triple Combination of Interferon Beta-1b, Lopinavir–Ritonavir, and Ribavirin in the Treatment of Patients Admitted to Hospital with COVID-19: An Open-Label, Randomised, Phase 2 Trial." *The Lancet* 395 (10238): 1695–1704. [https://doi.org/10.1016/S0140-6736\(20\)31042-4](https://doi.org/10.1016/S0140-6736(20)31042-4).
- Hur, Kevin, Caroline P E Price, Elizabeth L Gray, Reeti K Gulati, Matthew Maksimoski, Samuel D Racette, Alexander L Schneider, and Ashoke R Khanwalkar. n.d. "Factors Associated With Intubation and Prolonged Intubation in Hospitalized Patients With COVID-19." <https://doi.org/10.1177/0194599820929640>.
- Id, Xiao Lu, Mao Zhang, Anyu Qian, Luping Tang, and Shanxiang Xu. 2020. "Lung Ultrasound Score in Establishing the Timing of Intubation in COVID-19 Interstitial Pneumonia : A Preliminary Retrospective Observational Study," 1–10. <https://doi.org/10.1371/journal.pone.0238679>.
- Christiane Maria Prado Jeronimo, Maria Eduarda Leão Farias, Fernando Fonseca Almeida Val, Vanderson Souza Sampaio, Marcia Almeida Araújo Alexandre, Gisely Cardoso Melo, et al. 2020. "Methylprednisolone as Adjunctive Therapy for Patients Hospitalized With Coronavirus Disease 2019 (COVID-19; Metcovid): A Randomized, Double-Blind, Phase IIb, Placebo-Controlled Trial." *Clinical Infectious Diseases* 2019 (Xx): 1–9. <https://doi.org/10.1093/cid/ciaa1177>.

- Joyner, Michael J, Peter Marks, Arturo Casadevall, Michael J Joyner, R Scott Wright, Delisa Fairweather, Jonathon W Senefeld, et al. 2020. "Early Safety Indicators of COVID-19 Convalescent Plasma in 5000 Patients Early Safety Indicators of COVID-19 Convalescent Plasma in 5000 Patients" 130 (9): 4791–97.
- Kasgari, Hamideh Abbaspour, Siavash Moradi, Amir Mohammad Shabani, Farhang Babamahmoodi, Ali Reza, Davoudi Badabi, Lotfollah Davoudi, et al. 2020. "Evaluation of the Efficacy of Sofosbuvir plus Daclatasvir in Combination with Ribavirin for Hospitalized COVID-19 Patients with Moderate Disease Compared with Standard Care: A Single-Centre, Randomized Controlled Trial." *J Antimicrob Chemother* 75 (February): 3373–3378. <https://doi.org/10.1093/jac/dkaa332>.
- Keech, C, G Albert, I Cho, A Robertson, P Reed, S Neal, J S Plested, et al. 2020. "Phase 1–2 Trial of a SARS-CoV-2 Recombinant Spike Protein Nanoparticle Vaccine," 1–13. <https://doi.org/10.1056/NEJMoa2026920>.
- Kim, Dong Wook, Kyeong Hyang Byeon, Jaiyong Kim, Kyu Dong Cho, and Nakyoung Lee. 2020. "The Correlation of Comorbidities on the Mortality in Patients with COVID-19 : An Observational Study Based on the Korean National Health Insurance Big Data" 35 (26): 1–9.
- Kim, Jaiyong, Dong Wook Kim, Kwang-il Kim, Hong Bin Kim, Jong-hun Kim, Yong-gab Lee, Kyeong Hyang Byeon, Hae-kwan Cheong, and Hong Bin Kim. 2020. "Compliance of Antihypertensive Medication and Risk of Coronavirus Disease 2019 : A Cohort Study Using Big Data from the Korean National Health Insurance Service." *J Korean Med Sci* 35 (25): 1–12.
- Klersy, Catherine. 2020. "Mortality Reduction in 46 Severe Covid-19 Patients Treated with Hyperimmune Plasma . A Proof of Concept Single Arm Multicenter Interventional Trial."
- Knopp, Paul, Amy Miles, Thomas E Webb, Benjamin C Mcloughlin, Imran Mannan, Nadia Raja, Bettina Wan, Daniel Davis, and Daniel Davis. 2020. "Presenting Features of COVID - 19 in Older People : Relationships with Frailty , Inflammation and Mortality." *European Geriatric Medicine*, no. 0123456789: 3–8. <https://doi.org/10.1007/s41999-020-00373-4>.
- Li, Ling, Wei Zhang, Yu Hu, Xunliang Tong, Shangen Zheng, Juntao Yang, Yujie Kong, et al. 2020. "Effect of Convalescent Plasma Therapy on Time to Clinical Improvement in Patients with Severe and Life-Threatening COVID-19: A Randomized Clinical Trial." *JAMA - Journal of the American Medical Association* 324 (5): 460–70. <https://doi.org/10.1001/jama.2020.10044>.
- Li, Ting, Laifang Sun, Wenwu Zhang, Chanfan Zheng, Chenchen Jiang, Mingjing Chen, Di Chen, et al. 2020. "Bromhexine Hydrochloride Tablets for the Treatment of Moderate COVID-19: An Open-Label Randomized Controlled Pilot Study." *Clin Transl Sci* 13 (6): 1096–1102. <https://doi.org/10.1111/cts.12881>.
- Liao, Danying, Fen Zhou, Lili Luo, Min Xu, Hongbo Wang, Jiahong Xia, Yong Gao, et al. 2020. "Haematological Characteristics and Risk Factors in the Classification and Prognosis Evaluation of COVID-19 : A Retrospective Cohort Study." *The Lancet Haematology* 7 (9): e671–78. [https://doi.org/10.1016/S2352-3026\(20\)30217-9](https://doi.org/10.1016/S2352-3026(20)30217-9).
- Liu, Jiayi, Taili Chen, Haitao Yang, Yeyu Cai, Qizhi Yu, Juan Chen, Zhu Chen, et al. 2020. "Clinical and Radiological Changes of Hospitalised Patients with COVID-19 Pneumonia from Disease Onset to Acute Exacerbation : A Multicentre Paired Cohort Study," 5702–8.
- Liu, Q, N C Song, Z K Zheng, J S Li, and S K Li. 2020. "Laboratory Findings and a Combined Multifactorial Approach to Predict Death in Critically Ill Patients with COVID-19 : A Retrospective Study."
- Liu, Songqiao, Huanyuan Luo, Yuancheng Wang, Luis E Cuevas, Duolao Wang, and Shenghong Ju. 2020. "Clinical Characteristics and Risk Factors of Patients with Severe COVID-19 in Jiangsu Province , China : A Retrospective Multicentre Cohort Study," 1–9.
- Liu, Yue-ping, Gao-ming Li, Jun He, Ying Liu, Min Li, Rui Zhang, Ya-lan Li, Ya-zhou Wu, and Bo Diao. 2020. "Combined Use of the Neutrophil-to-Lymphocyte Ratio and CRP to

- Predict 7-Day Disease Severity in 84 Hospitalized Patients with COVID-19 Pneumonia : A Retrospective Cohort Study” 2019 (10). <https://doi.org/10.21037/atm-20-2372>.
- Lorenzo, Antonino De, Maria Grazia Tarsitano, Carmela Falcone, Laura Di Renzo, Lorenzo Romano, Sebastiano Macheda, Anna Ferrarelli, et al. 2020. “Fat Mass Affects Nutritional Status of ICU COVID-19 Patients.” *Journal of Translational Medicine* 18 (1): 1–8. <https://doi.org/10.1186/s12967-020-02464-z>.
- Mahmud, Nadim, Rebecca A Hubbard, David E Kaplan, and Marina Serper. 2020. “Declining Cirrhosis Hospitalizations in the Wake of the COVID-19 Pandemic: A National Cohort Study.” *Gastroenterology* 159 (January): 1134–1136.
- Mak, S. M., D. Mak, D. Hodson, R. Preston, A. Retter, L. Camporota, and G. Benedetti. 2020. “Pulmonary Ischaemia without Pulmonary Arterial Thrombus in COVID-19 Patients Receiving Extracorporeal Membrane Oxygenation: A Cohort Study.” *Clinical Radiology* 75 (10): 795.e1–795.e5. <https://doi.org/10.1016/j.crad.2020.07.006>.
- Mendoza, M, J Balcells, N Maiz, C Rodo, B Serrano, E Carreras, and A Suy. 2020. “Pre-Eclampsia-like Syndrome Induced by Severe COVID-19 : A Prospective Observational Study.” *BJOG* 127 (11): 1374–80. <https://doi.org/10.1111/1471-0528.16339>.
- Meng, Fanping, Ruonan Xu, Siyu Wang, Zhe Xu, Chao Zhang, Yuanyuan Li, Tao Yang, et al. 2020. “Human Umbilical Cord-Derived Mesenchymal Stem Cell Therapy in Patients with COVID-19 : A Phase 1 Clinical Trial.” *Signal Transduction and Targeted Therapy*, no. July. <https://doi.org/10.1038/s41392-020-00286-5>.
- Middleton, Elizabeth A, Xue-yan He, Frederik Denorme, Robert A Campbell, David Ng, Steven P Salvatore, Maria Mostyka, et al. 2020. “Neutrophil Extracellular Traps Contribute to Immunothrombosis in COVID-19 Acute Respiratory Distress Syndrome” 136 (10). <https://doi.org/10.1182/blood.2020007008>.
- Oriol Mitjà, Marc Corbacho-Monné, Maria Ubals, Cristian Tebe, Judith Peñafiel, Aurelio Tobias, et al. 2020. “Hydroxychloroquine for Early Treatment of Adults with Mild Covid-19: A Randomized-Controlled Trial.” *Clinical Infectious Diseases*, no. Xx: 1–9. <https://doi.org/10.1093/cid/ciaa1009>.
- Mukherjee, Vikramjit, Alexander T Toth, Madelin Fenianos, Sarah Martell, Hannah C Karpel, Radu Postelnicu, Alok Bhatt, et al. 2020. “Clinical Outcomes in Critically Ill Coronavirus City Public Hospital Experience,” no. 7: 1–8. <https://doi.org/10.1097/CCE.000000000000188>.
- Ng, Boon Hau, Nik Nuratiqah, Nik Abeed, Andrea Ban Yu-lin, Mohamed Faisal, Abdul Hamid, Chun Ian Soo, et al. 2020. “Lung Computed Tomography Patterns of a Cluster of Asymptomatic Young Males with COVID-19 Admitted to a Teaching Hospital in Kuala Lumpur” 75 (4): 368–71.
- Nguyen, Yann, Félix Corre, Vasco Honsel, Sonja Curac, Virginie Zarrouk, Catherine Paugam Burtz, Emmanuel Weiss, et al. 2020. “A Nomogram to Predict the Risk of Unfavourable Outcome in COVID-19: A Retrospective Cohort of 279 Hospitalized Patients in Paris Area.” *Annals of Medicine* 52 (7): 367–75. <https://doi.org/10.1080/07853890.2020.1803499>.
- Pirjani, Reihaneh, Reihaneh Hosseini, Tahereh Soori, Maryam Rabiei, Ladan Hosseini, Ameneh Abiri, Ashraf Moini, Arshia Shizarpour, Ghazal Razani, and Mahdi Sepidarkish. 2020. “Maternal and Neonatal Outcomes in COVID-19 Infected Pregnancies: A Prospective Cohort Study.” *Journal of Travel Medicine* 27 (7): 1–7. <https://doi.org/10.1093/jtm/taaa158>.
- Poncet-Megemont, Louis, Pauline Paris, Amélie Tronchere, Jean Pascal Salazard, Bruno Pereira, Radhouane Dallel, Claire Aumeran, et al. 2020. “High Prevalence of Headaches During Covid-19 Infection: A Retrospective Cohort Study.” *Headache* 60 (10): 2578–82. <https://doi.org/10.1111/head.13923>.
- Portole, Jose. 2020. “Chronic Kidney Disease and Acute Kidney Injury in the COVID-19 Spanish Outbreak,” no. December 2019: 235–36. <https://doi.org/10.1093/ndt/gfaa189>.

- Prata-barbosa, Arnaldo, Fernanda Lima-setta, Gustavo Rodrigues, Vanessa Soares, Roberta Esteves, Vieira De Castro, Daniela Carla, et al. 2020. "Pediatric Patients with COVID-19 Admitted to Intensive Care Units in Brazil : A Prospective Multicenter Study &." *Jornal de Pediatria*, no. xx. <https://doi.org/10.1016/j.jpmed.2020.07.002>.
- Qi, Lin, Yong Yang, Dixuan Jiang, Chao Tu, Lu Wan, Xiangyu Chen, and Zhihong Li. 2020. "International Journal of Infectious Diseases Factors Associated with the Duration of Viral Shedding in Adults with COVID-19 Outside of Wuhan , China : A Retrospective Cohort Study." *International Journal of Infectious Diseases* 96: 531–37. <https://doi.org/10.1016/j.ijid.2020.05.045>.
- Rahmani, Hamid, Effat Davoudi-monfared, Anahid Nourian, and Hossein Khalili. 2020. "Interferon  $\beta$ -1b in Treatment of Severe COVID-19: A Randomized Clinical Trial." *International Immunopharmacology* 88 (January).
- Ren, Zhigang, Hong Luo, Zujiang Yu, Jingchao Song, Lan Liang, Ling Wang, Haiyu Wang, et al. 2020. "A Randomized , Open-Label , Controlled Clinical Trial of Azvudine Tablets in the Treatment of Mild and Common COVID-19 , a Pilot Study" 2001435: 1–10. <https://doi.org/10.1002/adv.202001435>.
- Rosenberg, Eli S, Elizabeth M Dufort, Tomoko Udo, Larissa A Wilberschied, Jessica Kumar, James Tesoriero, Patti Weinberg, et al. 2020. "Association of Treatment With Hydroxychloroquine or Azithromycin With In-Hospital Mortality in Patients With COVID-19 in New York State" 12203 (24): 2493–2502. <https://doi.org/10.1001/jama.2020.8630>.
- Russo, Vincenzo, Marco Di, Emilio Attena, Angelo Silverio, Fernando Scudiero, Dario Celentani, Corrado Lodigiani, and Pierpaolo Di. 2020. "Clinical Impact of Pre-Admission Antithrombotic Therapy in Hospitalized Patients with COVID-19 : A Multicenter Observational Study." *Pharmacological Research* 159 (May): 104965. <https://doi.org/10.1016/j.phrs.2020.104965>.
- SA, Gorenstein, Castellano ML, Slone ES, Gillette B, Liu H, Alsamarraie C, Jacobson AM, et al. 2020. "Hyperbaric Oxygen Therapy for COVID-19 Patients with Respiratory Distress: Treated Cases versus Propensity-Matched Controls." *Undersea Hyperb Med* 47 (3).
- Sakai, T, C Hoshino, R Yamaguchi, M Hirao, R Nakahara, and A Okawa. 2020. "Remote Rehabilitation for Patients with Covid-19." *J Rehabil Med* 52 (9). <https://doi.org/10.2340/16501977-2731>.
- Salmon, Dominique, Sophie Bartier, Charlotte Hautefort, Yann Nguyen, Jérôme Nevoux, Anne-laure Hamel, Yohan Camhi, et al. 2020. "Self-Reported Loss of Smell without Nasal Obstruction to Identify COVID-19 . The Multicenter Coranosmia Cohort Study" 81: 614–20. <https://doi.org/10.1016/j.jinf.2020.07.005>.
- Satlin, M J, Parag Goyal, Reed Magleby, Grace A Maldarelli, Khanh Pham, Maiko Kondo Id, Edward J Schenck, et al. 2020. "Safety, Tolerability, and Clinical Outcomes of Hydroxychloroquine for Hospitalized Patients with Coronavirus 2019 Disease." *Plos One* 15 (7): e0236778. <https://doi.org/10.1371/journal.pone.0236778>.
- Sekhavati, E, F. Jafari, S. SeyedAlinaghi, S. Jamalimoghadasiahkali, S. Sadr, M. Tabarestani, M. Pirhayati, et al. 2020. "Safety and Effectiveness of Azithromycin in Patients with COVID-19: An Open-Label Randomised Trial." *International Journal of Antimicrobial Agents* 56 (January).
- Sengupta, Vikram, Sascha Sengupta, Angel Lazo, Peter Woods, Anna Nolan, and Nicholas Bremer. 2020. "Exosomes Derived from Bone Marrow Mesenchymal Stem Cells as Treatment for Severe COVID-19." *STEM CELLS AND DEVELOPMENT* 29 (12): 747–54. <https://doi.org/10.1089/scd.2020.0080>.
- Skipper, Caleb P., Katelyn A. Pastick, Nicole W. Engen, Ananta S. Bangdiwala, Mahsa Abassi, Sarah M. Lofgren, Darlisha A. Williams, et al. 2020. "Hydroxychloroquine in Nonhospitalized Adults With Early COVID-19 : A Randomized Trial." *Annals of Internal Medicine* 173 (8): 623–31. <https://doi.org/10.7326/M20-4207>.
- Spinner, Christoph D, Robert L Gottlieb, Gerard J Criner, José Ramón, Arribas López, Anna Maria Cattelan, Alex Soriano Viladomiu, et al. 2020. "Effect of Remdesivir vs Standard Care on Clinical Status at 11 Days in Patients With Moderate COVID-19 A Randomized Clinical Trial" 94404. <https://doi.org/10.1001/jama.2020.16349>.

- Stoeckle, Kate, Carrie D Johnston, Deanna P Jannat-khah, Samuel C Williams, Tanya M Ellman, Mary A Vogler, Roy M Gulick, Marshall J Glesby, and Justin J Choi. 2020. "COVID-19 in Hospitalized Adults With HIV," 1–7. <https://doi.org/10.1093/ofid/ofaa327>.
- Stoichitoiu, Laura Elena, Larisa Pinte, Marius Ioan Balea, Valentin Nedelcu, Camelia Badea, and Cristian Baicus. 2020. "Anticoagulant Protein S in COVID-19: Low Activity, and Associated with Outcome." *Romanian Journal of Internal Medicine* 0 (0): 1–21. <https://doi.org/10.2478/rjim-2020-0024>.
- Sun, Kaiyuan, Jenny Chen, and Cécile Viboud. 2020. "Articles Early Epidemiological Analysis of the Coronavirus Disease 2019 Outbreak Based on Crowdsourced Data : A Population-Level Observational Study." *Lancet Digital Health* 2 (e201-08). [https://doi.org/10.1016/S2589-7500\(20\)30026-1](https://doi.org/10.1016/S2589-7500(20)30026-1).
- Tang, Wei, Zhujun Cao, Mingfeng Han, Zhengyan Wang, Junwen Chen, Wenjin Sun, Yaojie Wu, et al. 2020. "Hydroxychloroquine in Patients with Mainly Mild to Moderate Coronavirus Disease 2019 : Open Label , Randomised Controlled Trial," no. April: 1–11. <https://doi.org/10.1136/bmj.m1849>.
- The Writing Committee for the REMAP-CAP Investigators. 2020. "Effect of Hydrocortisone on Mortality and Organ Support in Patients With Severe COVID-19 The REMAP-CAP COVID-19 Corticosteroid Domain Randomized Clinical Trial." *JAMA - Journal of the American Medical Association* 15261. <https://doi.org/10.1001/jama.2020.17022>.
- Tomazini, Bruno M., Israel S. Maia, Alexandre B. Cavalcanti, Otavio Berwanger, Regis G. Rosa, Viviane C. Veiga, Alvaro Avezum, et al. 2020. "Effect of Dexamethasone on Days Alive and Ventilator-Free in Patients with Moderate or Severe Acute Respiratory Distress Syndrome and COVID-19: The CoDEX Randomized Clinical Trial." *JAMA - Journal of the American Medical Association* 324 (13): 1307–16. <https://doi.org/10.1001/jama.2020.17021>.
- Tschopp, Jonathan, Arnaud G L Huillier, Matteo Mombelli, Nicolas J Mueller, Nina Khanna, Christian Garzoni, Dario Meloni, Matthaios Papadimitriou-olivgeris Dionysios, and Neofytos Hans. n.d. "First Experience of SARS-CoV-2 Infections in Solid Organ Transplant Recipients in the Swiss Transplant Cohort Study." <https://doi.org/10.1111/ajt.16062>.
- Vaid, N, M Ardissino, T A N Reed, J Goodall, P Utting, M Miscampbell, D Condurache, et al. 2020. "Clinical Characteristics and Outcomes of Immunosuppressed Patients Hospitalized with COVID-19 : Experience from London," 1–10. <https://doi.org/10.1111/joim.13172>.
- Wang, Yeming, Dingyu Zhang, Guanhua Du, Ronghui Du, Jianping Zhao, Yang Jin, Shouzhi Fu, et al. 2020. "Remdesivir in Adults with Severe COVID-19: A Randomised, Double-Blind, Placebo-Controlled, Multicentre Trial." *The Lancet* 395 (10236): 1569–78. [https://doi.org/10.1016/S0140-6736\(20\)31022-9](https://doi.org/10.1016/S0140-6736(20)31022-9).
- Wang, Yu, Huaiyu Tian, Li Zhang, Man Zhang, Dandan Guo, Wenting Wu, Xingxing Zhang, et al. 2020. "Reduction of Secondary Transmission of SARS-CoV-2 in Households by Face Mask Use, Disinfection and Social Distancing: A Cohort Study in Beijing, China." *BMJ Global Health* 5 (5): 1–9. <https://doi.org/10.1136/bmjgh-2020-002794>.
- Winston, Alan, Davide De Francesco, Frank Post, Marta Boffito, Jaime Vera, Ian Williams, Jane Anderson, Patrick W G Mallon, Caroline A Sabin, and Poppy Study. 2020. "Comorbidity Indices in People with HIV and Considerations for Coronavirus Disease 2019 Outcomes," no. June. <https://doi.org/10.1097/QAD.0000000000002606>.
- Wu, Jianfeng, Jianqiang Huang, Guochao Zhu, Yihao Liu, Han Xiao, Qian Zhou, Xiang Si, et al. 2020. "Systemic Corticosteroids and Mortality in Severe and Critical COVID-19 Patients in Wuhan, China." *J Clin Endocrinol Metab* 105 (12): 1–10. <https://doi.org/10.1210/clinem/dgaa627>.
- Wu, Y, C Liu, L Dong, C Zhang, Y Chen, J Liu, C Zhang, et al. 2020. "Coronavirus Disease 2019 among Pregnant Chinese Women : Case Series Data on the Safety of Vaginal Birth and Breastfeeding." *BJOG* 127 (9): 1109–15. <https://doi.org/10.1111/1471-0528.16276>.
- Wu, Yongran, Ke Hong, Lianguo Ruan, Xiaobo Yang, Jiancheng Zhang, Jiqian Xu, and Shangwen Pan. 2020. "Patients with Prolonged Positivity of SARS-CoV-2 RNA Benefit from Convalescent Plasma Therapy : A Retrospective Study." *Virologica Sinica* 12250. <https://doi.org/10.1007/s12250-020-00281-8>.



- Xia, Lu, Jun Chen, Thomas Friedemann, Zongguo Yang, Yun Ling, Xuhui Liu, Shuihua Lu, et al. 2020. "The Course of Mild and Moderate COVID-19 Infections — The Unexpected Long-Lasting Challenge," 1–7. <https://doi.org/10.1093/ofid/ofaa286>.
- Xiao, Mingzhong, Jiaying Tian, Yana Zhou, Xi Xu, Xiaojun Min, and Yi Lv. 2020. "Efficacy of Huoxiang Zhengqi Dropping Pills and Lianhua Qingwen Granules in Treatment of COVID-19: A Randomized Controlled Trial." *Pharmacological Research* 161 (January).
- Xiong, Wu-zhong, Gang Wang, Juan Du, and Wang Ai. 2020. "Integrative Medicine Research Efficacy of Herbal Medicine ( Xuanfei Baidu Decoction ) Combined with Conventional Drug in Treating COVID-19 : A Pilot Randomized Clinical Trial." *Integrative Medicine Research* 9 (3): 100489. <https://doi.org/10.1016/j.imr.2020.100489>.
- Yan, Nao, Zhipeng Xu, Bin Mei, Yongzhe Gao, Dongwei Lv, and Junjian Zhang. 2020. "Neurological Implications of Non-Critically Ill Patients With Coronavirus Disease 2019 in a Fangcang Shelter Hospital in Wuhan , Clinical Characteristics of Patients With" 11 (August): 1–7. <https://doi.org/10.3389/fneur.2020.00895>.
- Zhang, Lan, and Songming Huang. 2020. "Clinical Features of 33 Cases in Children Infected With SARS-CoV-2 in Anhui Province , China – A Multi-Center Retrospective Cohort Study" 8 (June): 1–7. <https://doi.org/10.3389/fpubh.2020.00255>.
- Zhang, Shuai, Mengfei Guo, Feng Wu, Nian Xiong, Yanling Ma, Zhihui Wang, Limin Duan, Lan Chen, Haixia Ouyang, and Yang Jin. 2020. "Factors Associated with Asymptomatic Infection in Health-Care Workers with Severe Acute Respiratory Syndrome Coronavirus 2 Infection in Wuhan , China : A Multicentre Retrospective Cohort Study." *Clinical Microbiology and Infection* 26 (12): 1670–75. <https://doi.org/10.1016/j.cmi.2020.08.038>.
- Zheng, Fang, Yanwen Zhou, Zhiguo Zhou, Fei Ye, Baoying Huang, Yaxiong Huang, Jing Ma, et al. 2020. "SARS-CoV-2 Clearance in COVID-19 Patients with Novaferon Treatment: A Randomized, Open-Label, Parallel-Group Trial." *International Journal of Infectious Diseases* 99: 84–91. <https://doi.org/10.1016/j.ijid.2020.07.053>.
- Zhong, Qi, Yin Y Liu, Qiong Luo, Yu F Zou, Hai X Jiang, Hui Li, Jing J Zhang, et al. 2020. "Spinal Anaesthesia for Patients with Coronavirus Disease 2019 and Possible Transmission Rates in Anaesthetists : Retrospective , Single- Centre , Observational Cohort Study." *British Journal of Anaesthesia* 124 (6): 670–75. <https://doi.org/10.1016/j.bja.2020.03.007>.
- Zhou, Yongxia, Yineng Zheng, Quan Yang, Liangbo Hu, Juan Liao, and Xiaoyan Li. 2020. "Cohort Study of Chest CT and Clinical Changes in 29 Patients with Coronavirus Disease 2019 ( COVID-19 )" 2019 (439).
- Zhu, Feng Cai, Yu Hua Li, Xu Hua Guan, Li Hua Hou, Wen Juan Wang, Jing Xin Li, Shi Po Wu, et al. 2020. "Safety, Tolerability, and Immunogenicity of a Recombinant Adenovirus Type-5 Vectored COVID-19 Vaccine: A Dose-Escalation, Open-Label, Non-Randomised, First-in-Human Trial." *The Lancet* 395 (10240): 1845–54. [https://doi.org/10.1016/S0140-6736\(20\)31208-3](https://doi.org/10.1016/S0140-6736(20)31208-3).
